# Supplementary material for: Molecular Mapping of Urinary Complement Peptides in Kidney Diseases
Source: MDPI journal article supplement (doi:10.3390/proteomes9040049), 2021-12-13

**e06787**

Sequence: IGGLRNNNEKDMALT, Charge: +2, Monoisotopic m/z: 823.41852 Da (-1.44 mmu/-1.74 ppm), MH+: 1645.82976 Da, RT: 60.2435 min,  
Identified with: Sequest HT (v1.17); XCorr:2.81,  
Fragment match tolerance used for search: 0.05 Da  
Fragments used for search: -H<sub>2</sub>O; y; -NH<sub>3</sub>; y; b; b; -H<sub>2</sub>O; b; -NH<sub>3</sub>; y

Protein:

- Complement C3

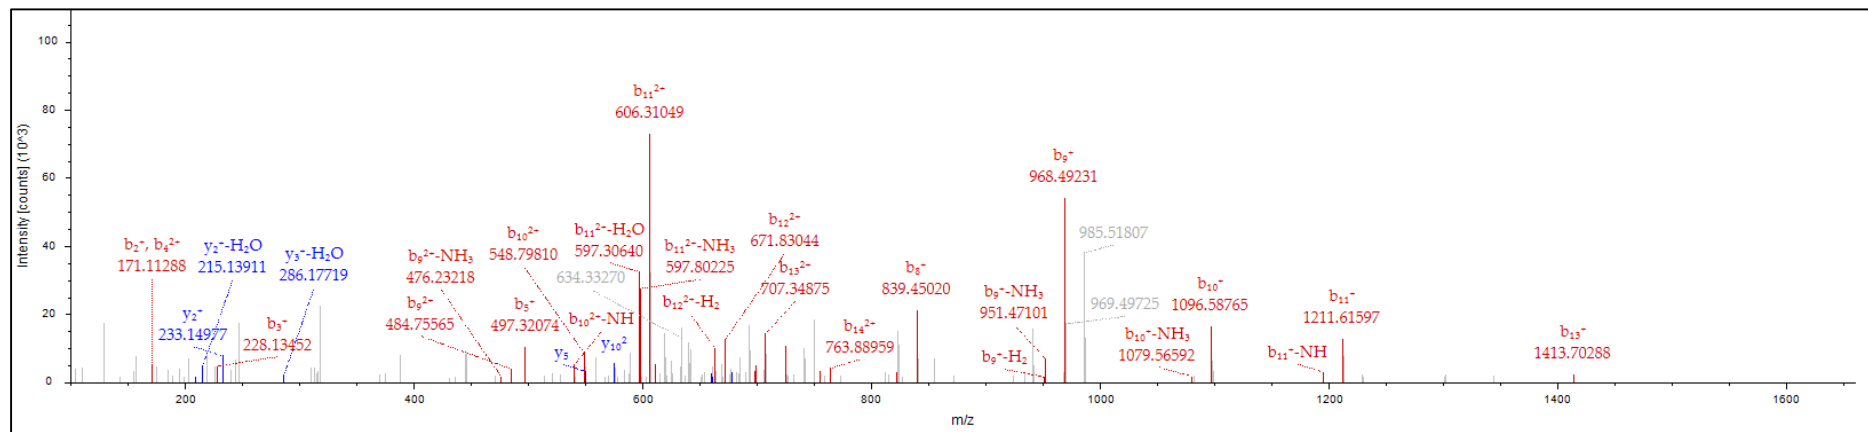

**e08849**

Sequence: YQKDAPDHQELNLDVS, Charge: +2, Monoisotopic m/z: 936.44110 Da (-1.04 mmu/-1.11 ppm), MH+: 1871.87493 Da,

Identified with: Sequest HT (v1.17); XCorr:2.58,

Fragment match tolerance used for search: 0.05 Da

Fragments used for search: -H<sub>2</sub>O; y; -NH<sub>3</sub>; y; b; b; -H<sub>2</sub>O; b; -NH<sub>3</sub>; y

Protein:

- Complement C3

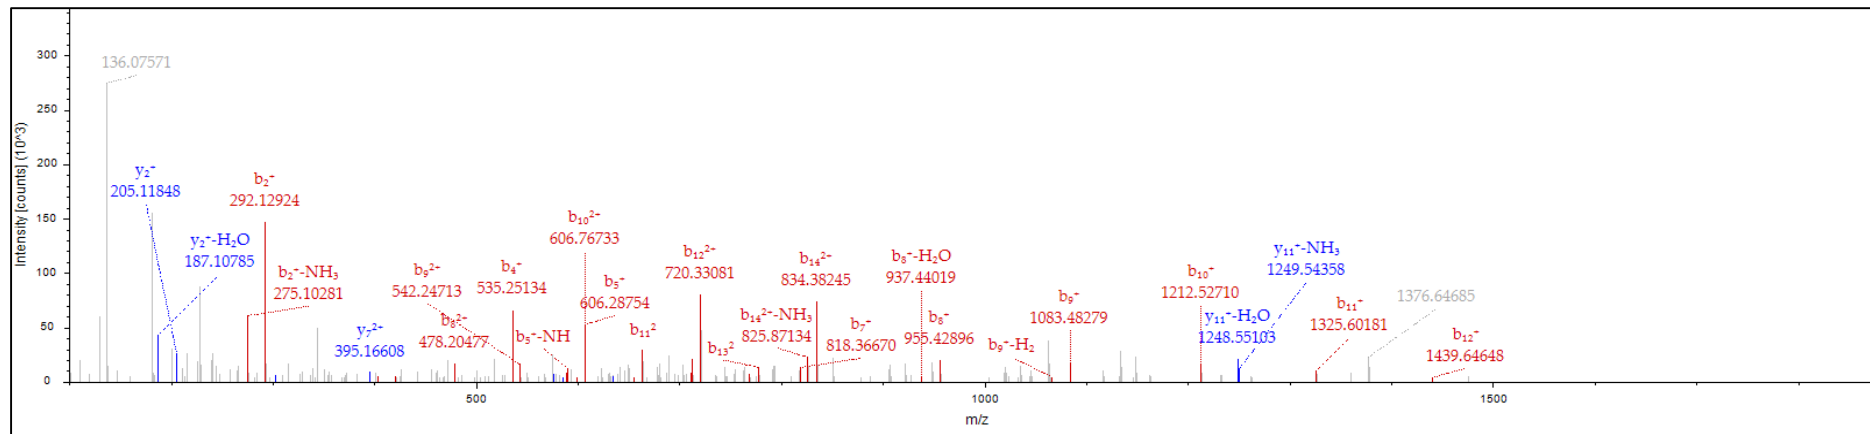

**e09686**

Sequence: QALAQYQKDAPDHQELN, Charge: +3, Monoisotopic m/z: 656.98444 Da (-0.75 mmu/-1.14 ppm), MH+: 1968.93875 Da,  
Identified with: Sequest HT (v1.17); XCorr:4.46,  
Fragment match tolerance used for search: 0.05 Da  
Fragments used for search: -H<sub>2</sub>O; y; -NH<sub>3</sub>; y; b; b; -H<sub>2</sub>O; b; -NH<sub>3</sub>; y

Protein:

- Complement C3

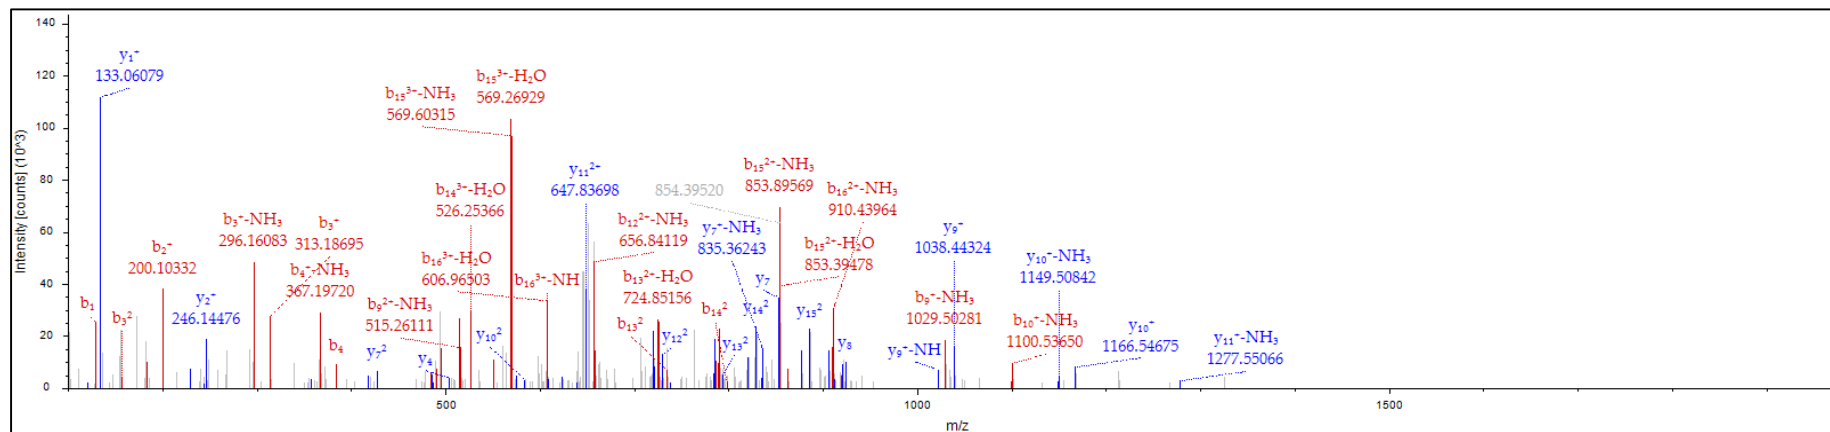

**e14381**

Sequence: LTTAKDKNRWEDPGKQLYNVEAT, Charge: +3, Monoisotopic m/z: 893.12323 Da (-0.96 mmu/-1.08 ppm), MH+: 2677.35514 Da, Identified with: Sequest HT (v1.17); XCorr:4.74, Fragment match tolerance used for search: 0.05 Da  
Fragments used for search: -H<sub>2</sub>O; y; -NH<sub>3</sub>; y; b; b; -H<sub>2</sub>O; b; -NH<sub>3</sub>; y

Protein:

- Complement C3

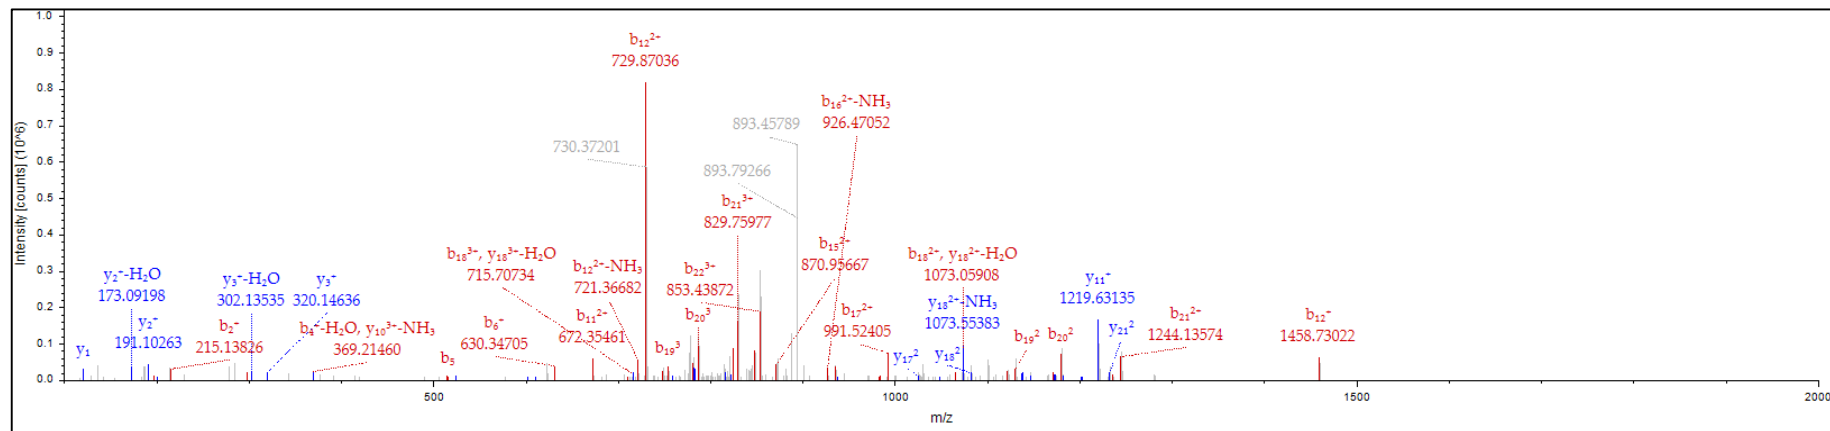

**e16109**

Sequence: LTTAKDKNRWEDPGKQLYNVEATSYA, Charge: +3, Monoisotopic m/z: 1000.16779 Da (-0.56 mmu/-0.56 ppm), MH<sup>+</sup>: 2998.48880 Da,  
Identified with: Sequest HT (v1.17); XCorr:4.02,  
Fragment match tolerance used for search: 0.05 Da  
Fragments used for search: -H<sub>2</sub>O; y; -NH<sub>3</sub>; y; b; b; -H<sub>2</sub>O; b; -NH<sub>3</sub>; y

Protein:

- Complement C3

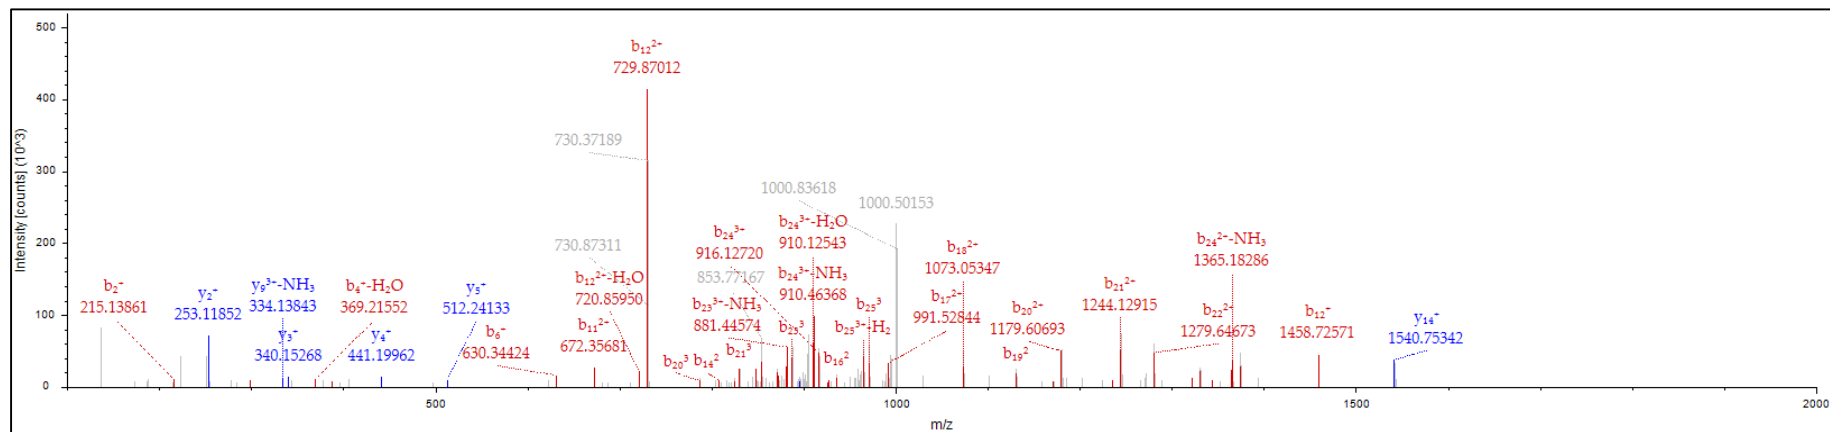

**e08566**

Sequence: TETIEGVDAEDGHGPGEQ, Charge: +2, Monoisotopic m/z: 920.89429 Da (-0.93 mmu/-1.01 ppm), MH+: 1840.78130 Da,  
Identified with: Sequest HT (v1.17); XCorr:4.35,  
Fragment match tolerance used for search: 0.05 Da  
Fragments used for search: -H<sub>2</sub>O; y; -NH<sub>3</sub>; y; b; b; -H<sub>2</sub>O; y

Protein:

- Complement factor B

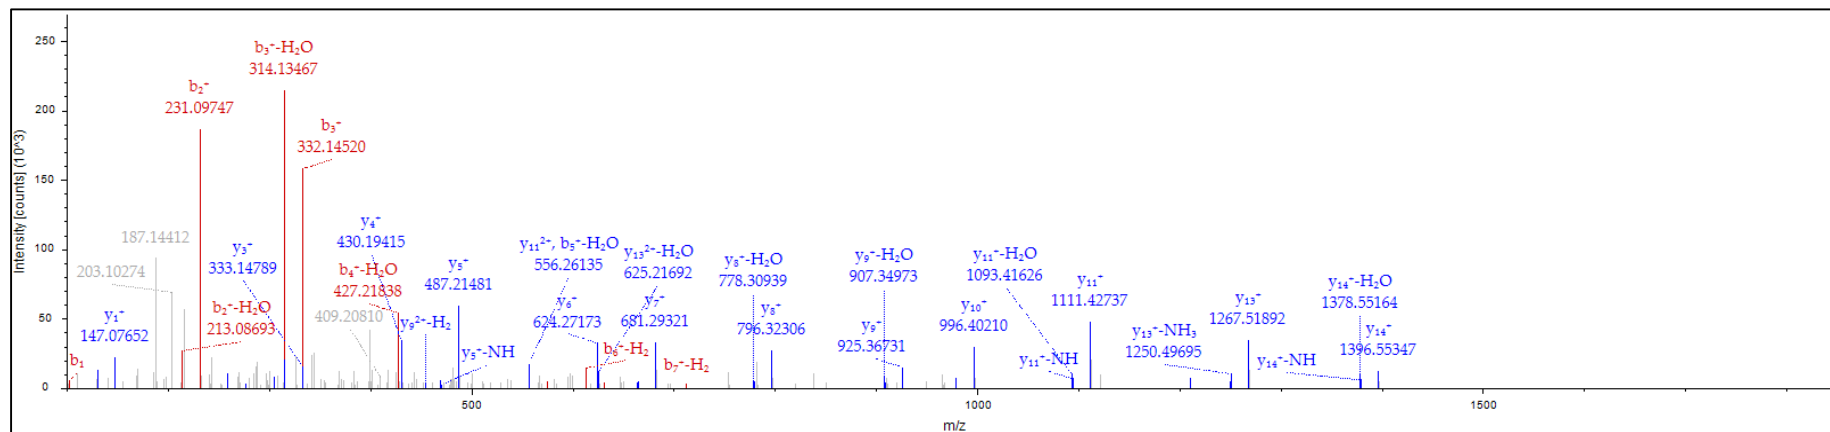

**e11594**

Sequence: LSSLTETIEGVDAEDGHGPGEQ, Charge: +2, Monoisotopic m/z: 1121.00940 Da (-1.91 mmu/-1.7 ppm), MH+: 2241.01152 Da,  
Identified with: Sequest HT (v1.17); XCorr:2.36,  
Fragment match tolerance used for search: 0.05 Da  
Fragments used for search: -H<sub>2</sub>O; y; -NH<sub>3</sub>; y; b; b; -H<sub>2</sub>O; y

Protein:

- Complement factor B

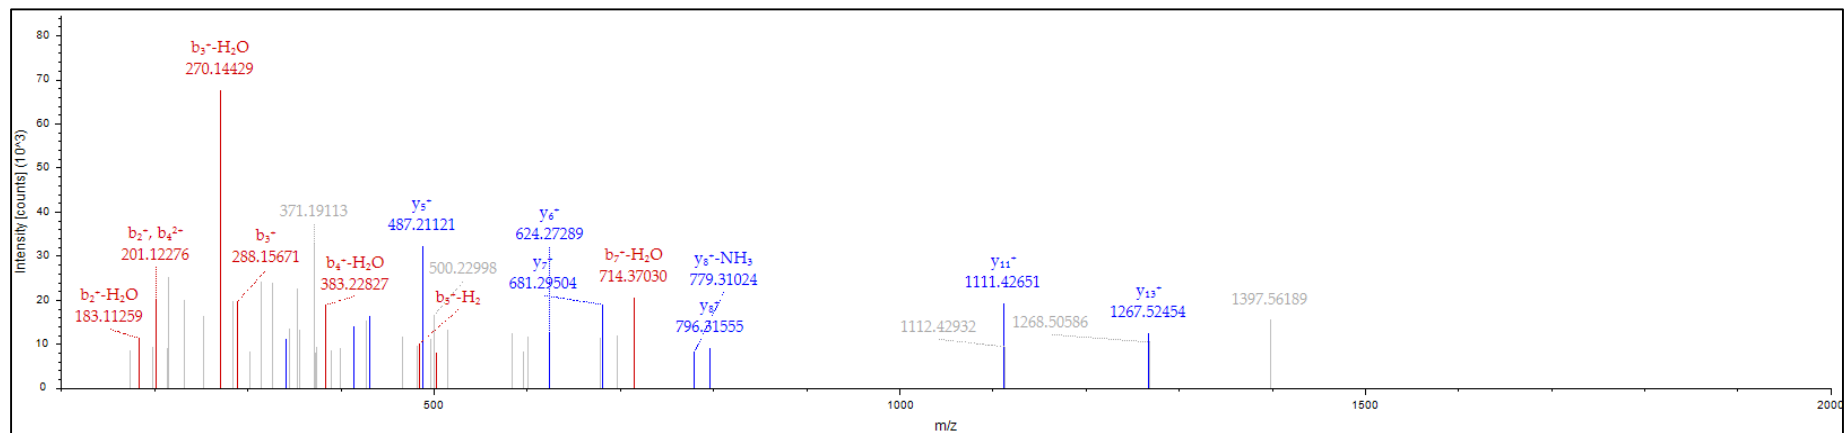

**e09265**

Sequence: DELPAKDDPDAPLQPVTP, Charge: +2, Monoisotopic m/z: 959.47534 Da (-0.3 mmu/-0.32 ppm), MH+: 1917.94341 Da,

Identified with: Sequest HT (v1.17); XCorr:3.22,

Fragment match tolerance used for search: 0.05 Da

Fragments used for search: -H<sub>2</sub>O; y; -NH<sub>3</sub>; y; b; b; -H<sub>2</sub>O; b; -NH<sub>3</sub>; y

Protein:

- Complement C4-B

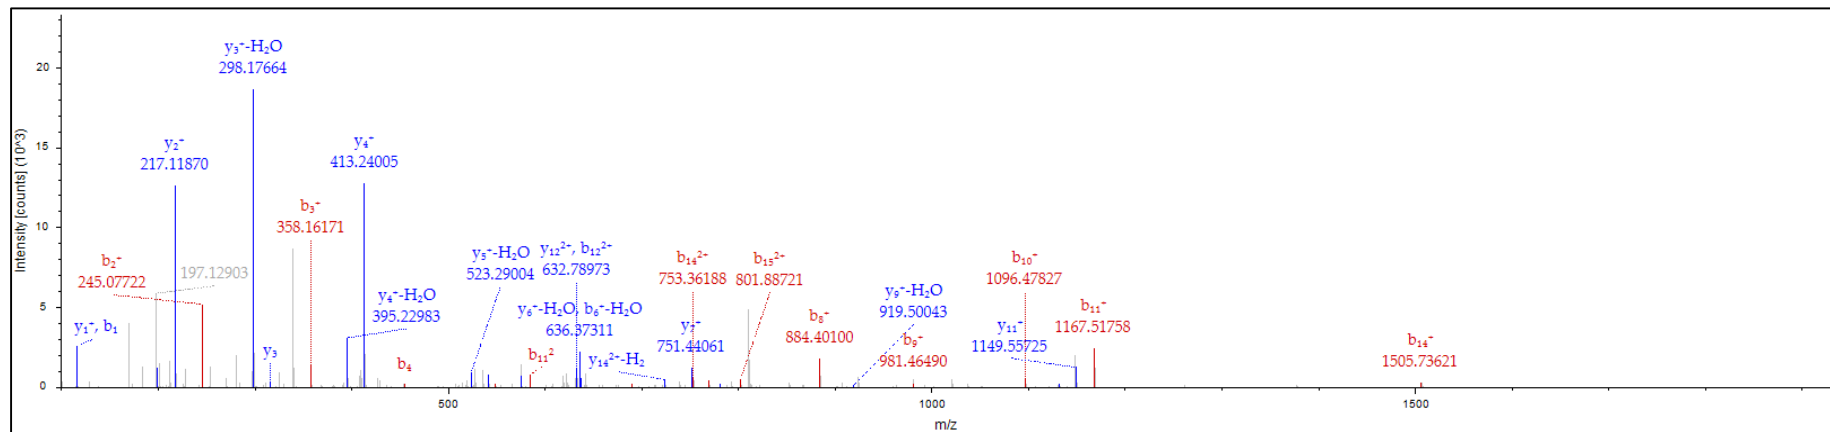



**e08161**

Sequence: TLTKAPADLRGVAHNNL, Charge: +3, Monoisotopic m/z: 597.66779 Da (+0.55 mmu/+0.92 ppm), MH+: 1790.98880 Da,

Identified with: Sequest HT (v1.17); XCorr:2.95,

Fragment match tolerance used for search: 0.05 Da

Fragments used for search: -H<sub>2</sub>O; y; -NH<sub>3</sub>; y; b; b; -H<sub>2</sub>O; b; -NH<sub>3</sub>; y

Protein:

- Complement C4-B

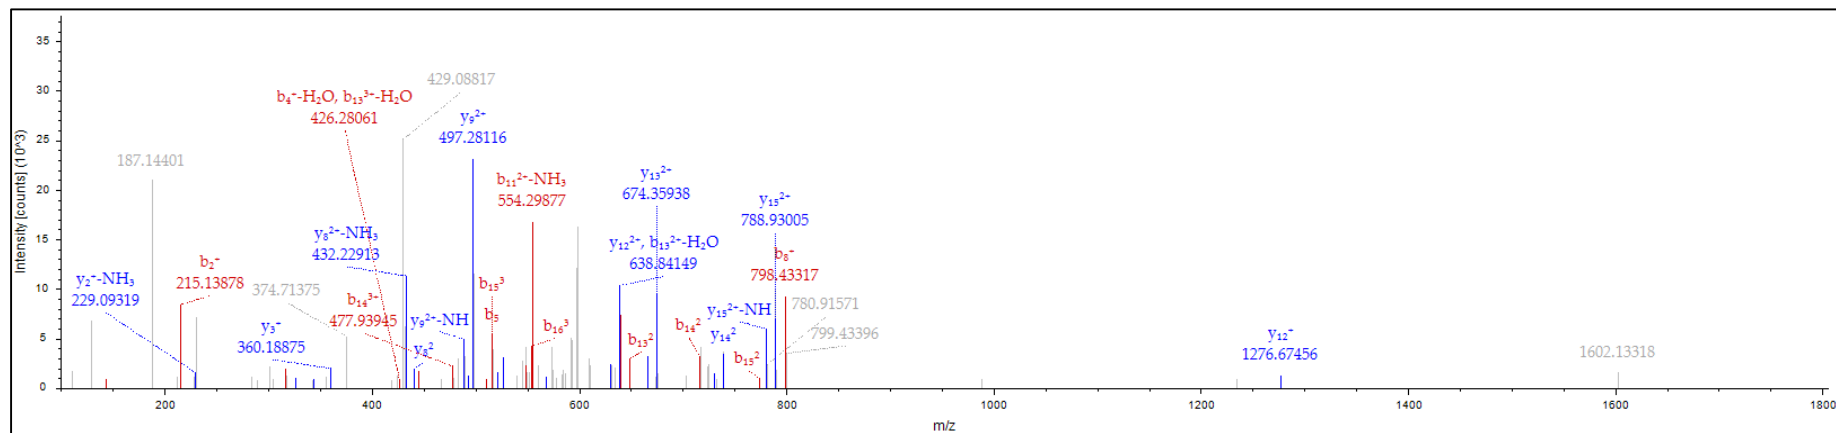

**e13403**

Sequence: FLSSLTETIEGVDAEDGHGPGEQQ, Charge: +2, Monoisotopic m/z: 1258.57336 Da (-1.44 mmu/-1.14 ppm), MH+: 2516.13945 Da,  
Identified with: Sequest HT (v1.17); XCorr:2.03,  
Fragment match tolerance used for search: 0.05 Da  
Fragments used for search: -H<sub>2</sub>O; y; -NH<sub>3</sub>; y; b; -H<sub>2</sub>O; b; -NH<sub>3</sub>; y

Protein:

- Complement factor B

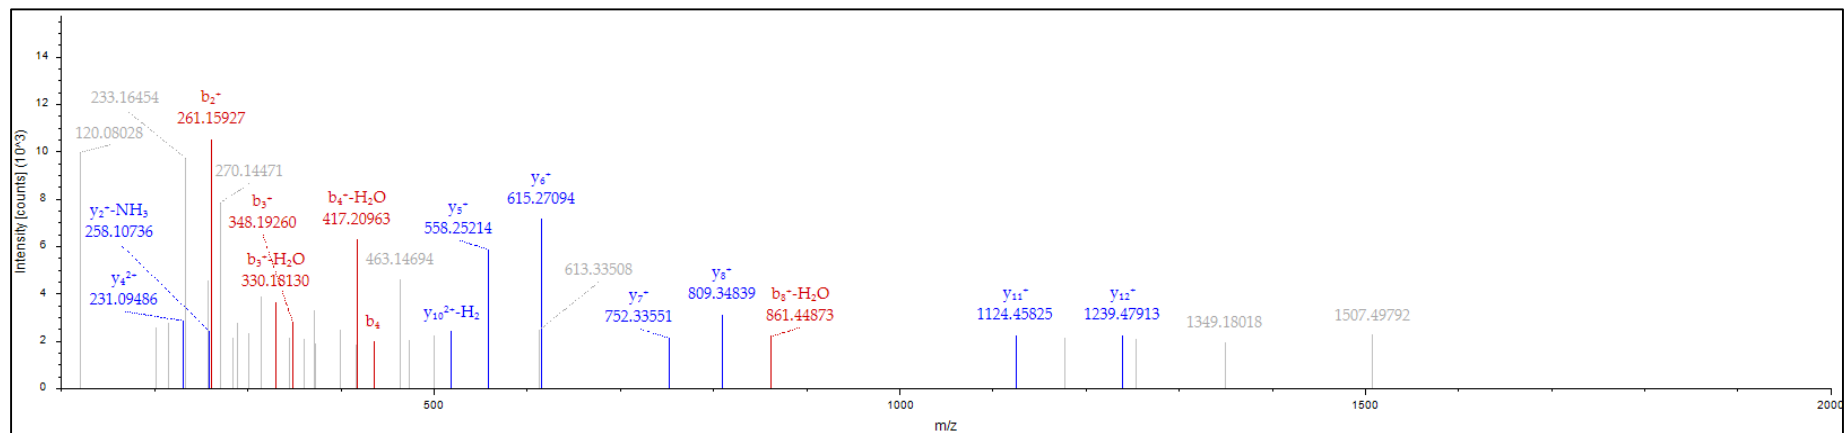

**e00117**

Sequence: LGVAHNNL, Charge: +2, Monoisotopic m/z: 419.23227 Da (-0.23 mmu/-0.56 ppm), MH<sup>+</sup>: 837.45726 Da, RT: 53.4069 min,  
Identified with: Sequest HT (v1.17); XCorr:2.11,  
Fragment match tolerance used for search: 0.05 Da  
Fragments used for search: -NH<sub>3</sub>; y; b; b; -NH<sub>3</sub>; y

Protein:

- Complement C4-A

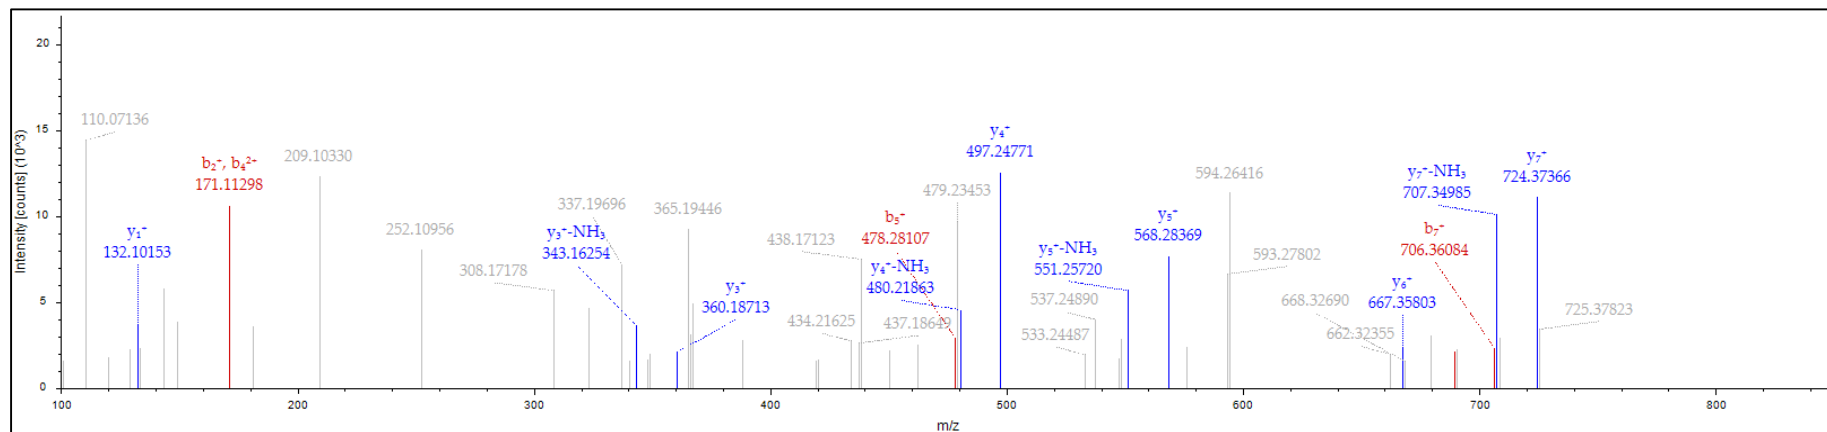

**e11703**

Sequence: SSLTETIEGVDAEDGHGPGEQQ, Charge: +2, Monoisotopic m/z: 1128.49744 Da (-1.13 mmu/-1 ppm), MH+: 2255.98760 Da,  
Identified with: Sequest HT (v1.17); XCorr:2.66,  
Fragment match tolerance used for search: 0.05 Da  
Fragments used for search: -H<sub>2</sub>O; y; -NH<sub>3</sub>; y; b; b; -H<sub>2</sub>O; b; -NH<sub>3</sub>; y

Protein:

- Complement factor B

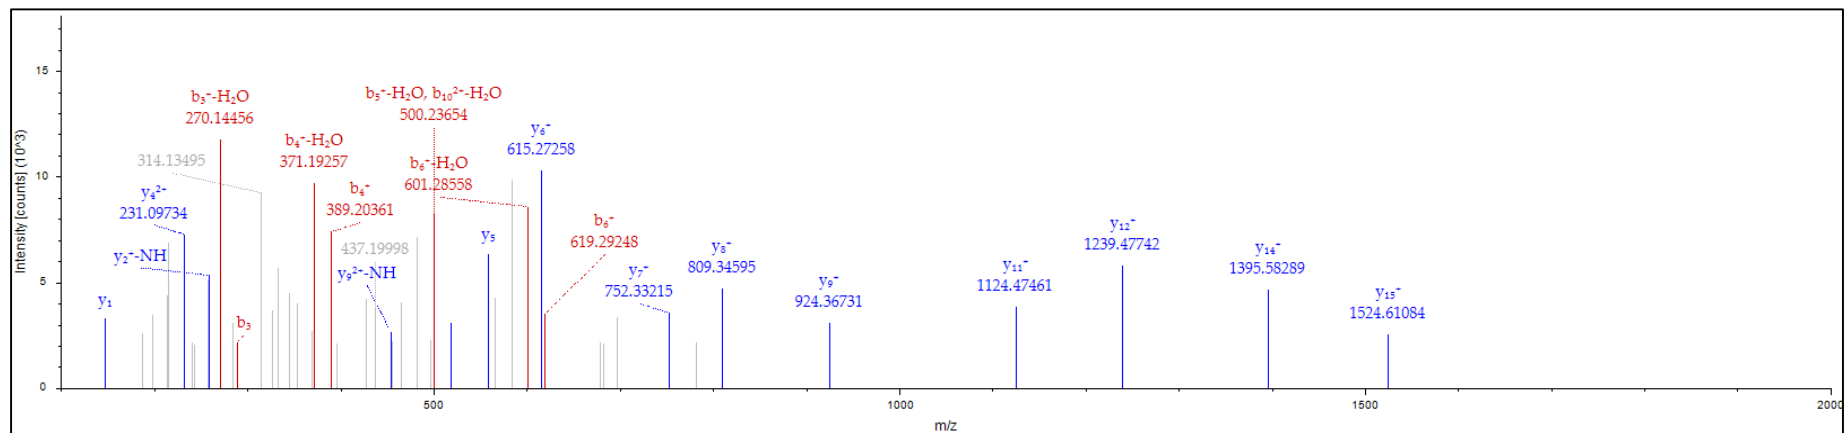

**e12606**

Sequence: LSSLTETIEGVDAEDGHGPGEEQQ, Charge: +3, Monoisotopic m/z: 790.36224 Da (-0.58 mmu/-0.73 ppm), MH+: 2369.07218 Da, Identified with: Sequest HT (v1.17); XCorr:4.38,

Fragment match tolerance used for search: 0.05 Da

Fragments used for search: -H<sub>2</sub>O; y; -NH<sub>3</sub>; y; b; b; -H<sub>2</sub>O; b; -NH<sub>3</sub>; y

Protein:

- Complement factor B

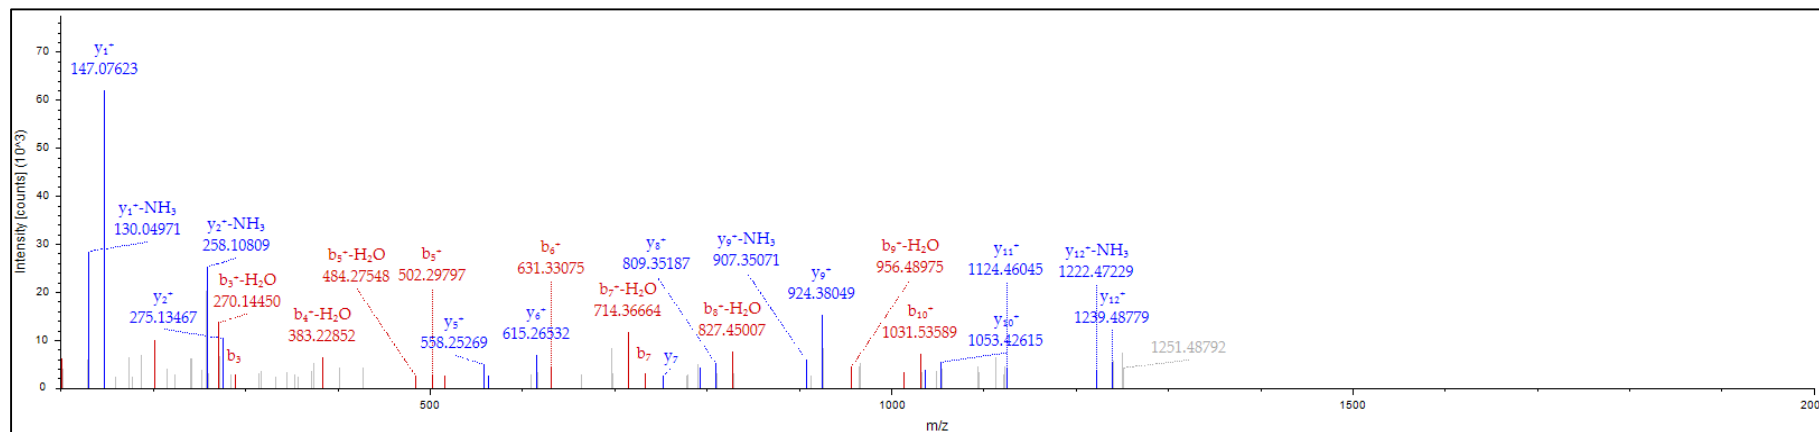

**e09429**

Sequence: EGVQKEDIPPADLSDQVP, Charge: +2, Monoisotopic m/z: 968.97766 Da (-0.89 mmu/-0.92 ppm), MH+: 1936.94805 Da,

Identified with: Sequest HT (v1.17); XCorr:2.81,

Fragment match tolerance used for search: 0.05 Da

Fragments used for search: -H<sub>2</sub>O; y; -NH<sub>3</sub>; y; b; b; -H<sub>2</sub>O; b; -NH<sub>3</sub>; y

Protein:

- Complement C3

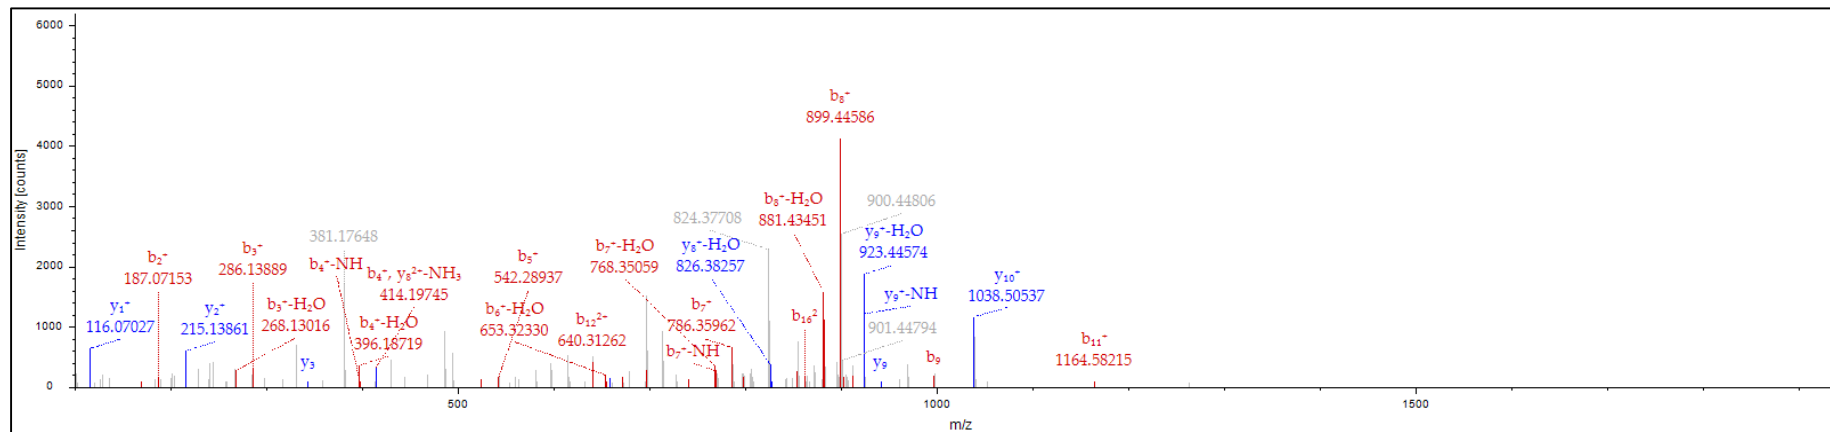

**e17084**

Sequence: EGVQKEDIPPADLSQVDPDTESETRILLQ, Charge: +3, Monoisotopic m/z: 1074.87073 Da (-1.2 mmu/-1.11 ppm), MH+: 3222.59763 Da,  
Identified with: Sequest HT (v1.17); XCorr:3.40,  
Fragment match tolerance used for search: 0.05 Da  
Fragments used for search: -H<sub>2</sub>O; y; -NH<sub>3</sub>; y; b; b; -H<sub>2</sub>O; b; -NH<sub>3</sub>; y

Protein:

- Complement C3

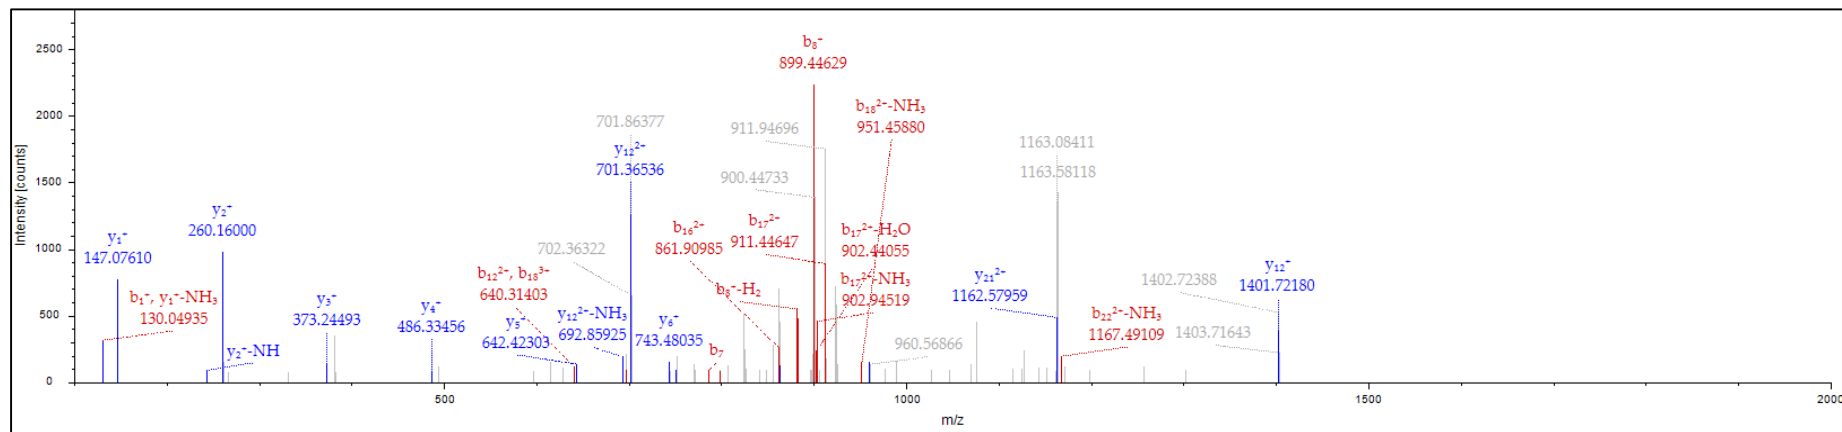

**e18666**

Sequence: EGVQKEDIPPADLSDQVPDTESETRILLQGTPVA, Charge: +3, Monoisotopic m/z: 1216.61108 Da (-3.32 mmu/-2.73 ppm), MH+: 3647.81870 Da,  
Identified with: Sequest HT (v1.17); XCorr:2.23,

Fragment match tolerance used for search: 0.05 Da

Fragments used for search: -H<sub>2</sub>O; y; -NH<sub>3</sub>; y; b; b; -H<sub>2</sub>O; b; -NH<sub>3</sub>; y

Protein:

- Complement C3

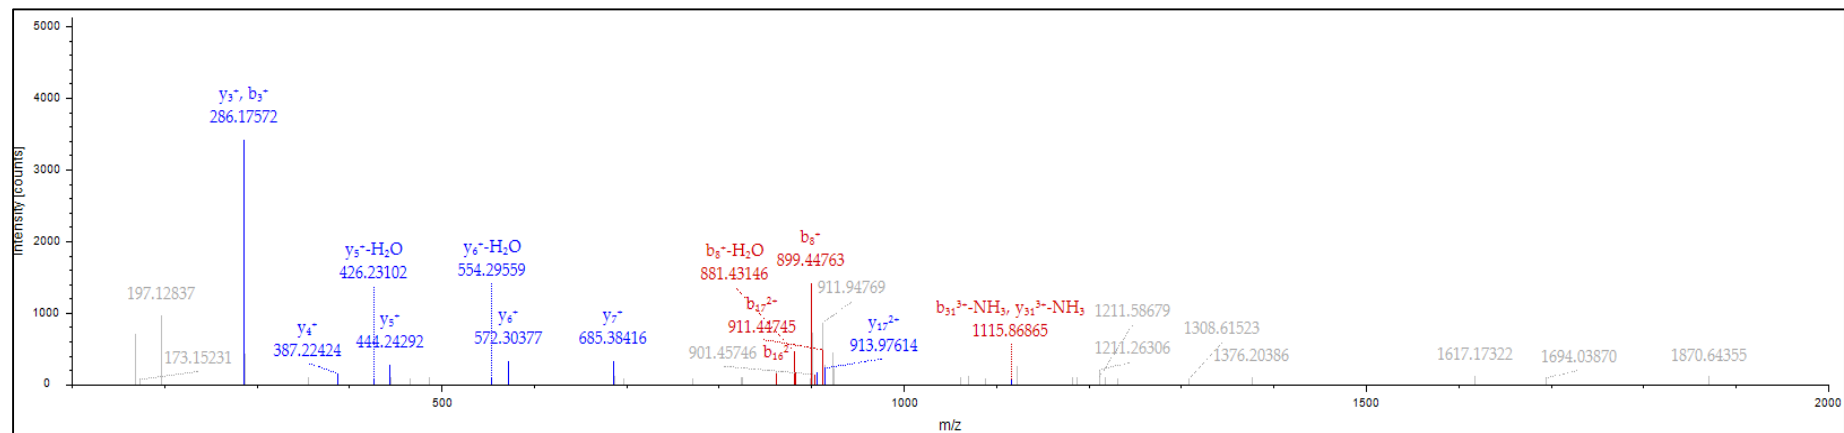



**e12939**

Sequence: LQGTPVAQMTEDAVDAERLKHL, Charge: +4, Monoisotopic m/z: 606.31476 Da (-0.57 mmu/-0.94 ppm), MH+: 2422.23720 Da, Identified with: Sequest HT (v1.17); XCorr:2.93,

Fragment match tolerance used for search: 0.05 Da

Fragments used for search: -H<sub>2</sub>O; y; -NH<sub>3</sub>; y; b; b; -H<sub>2</sub>O; b; -NH<sub>3</sub>; y

Protein:

- Complement C3

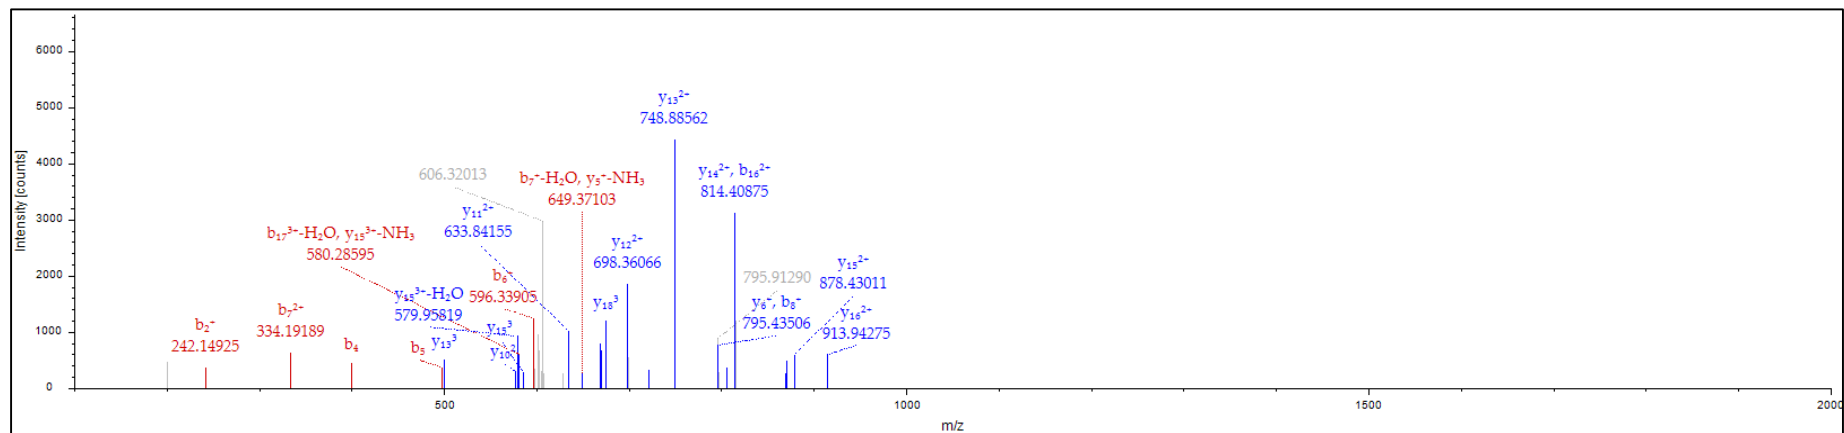

**e06142**

Sequence: TKAPADLRGVAHNNL, Charge: +3, Monoisotopic m/z: 526.28931 Da (-0.68 mmu/-1.3 ppm), MH+: 1576.85337 Da,

Identified with: Sequest HT (v1.17); XCorr:3.67,

Fragment match tolerance used for search: 0.05 Da

Fragments used for search: -H<sub>2</sub>O; y; -NH<sub>3</sub>; y; b; b; -H<sub>2</sub>O; b; -NH<sub>3</sub>; y

Protein:

- Complement C4-B

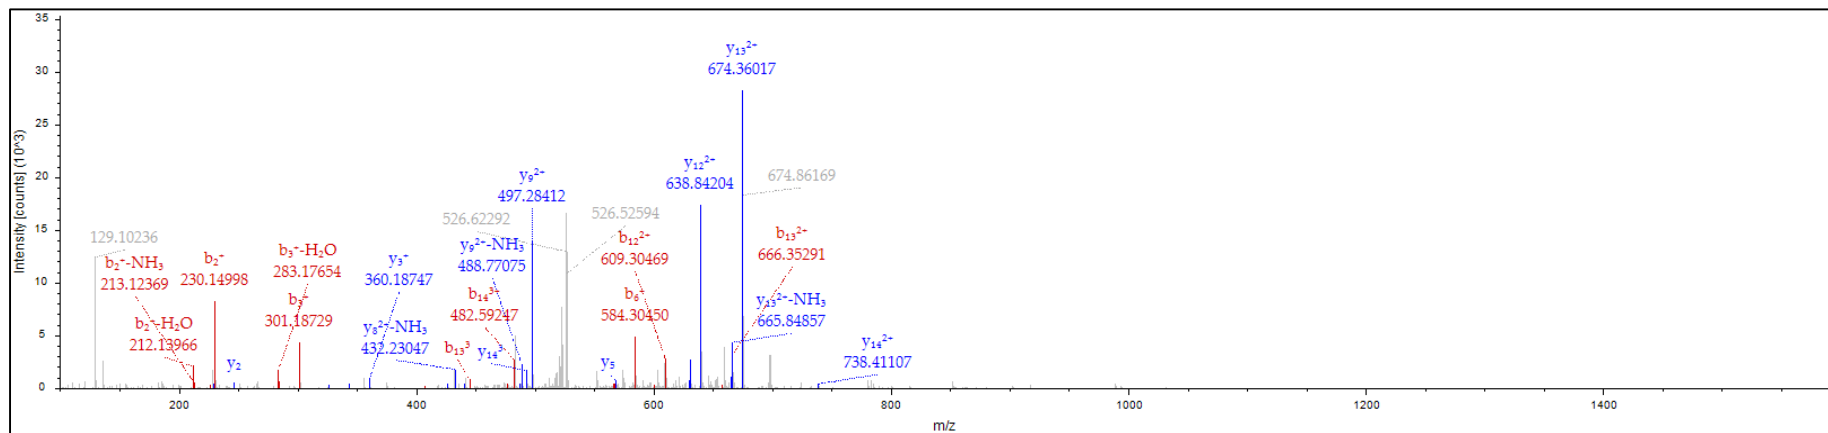

**e09682**

Sequence: TETIEGVDAEDGHGPGEQQ, Charge: +2, Monoisotopic m/z: 984.92352 Da (-0.98 mmu/-1 ppm), MH+: 1968.83977 Da,

Identified with: Sequest HT (v1.17); XCorr:5.18,

Fragment match tolerance used for search: 0.05 Da

Fragments used for search: -H<sub>2</sub>O; y; -NH<sub>3</sub>; y; b; b; -H<sub>2</sub>O; b; -NH<sub>3</sub>; y

Protein:

- Complement factor B

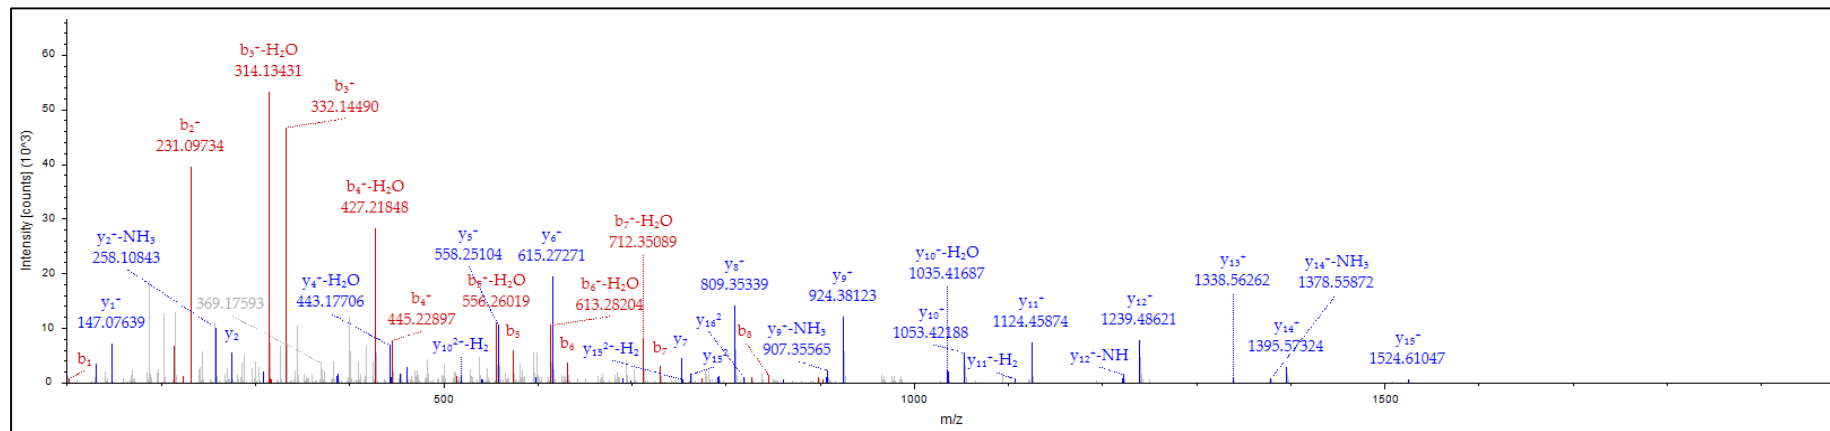

**e10517**

Sequence: LTETIEGVDAEDGHGPGEQQ, Charge: +2, Monoisotopic m/z: 1041.46448 Da (-2.06 mmu/-1.98 ppm), MH+: 2081.92168 Da,

Identified with: Sequest HT (v1.17); XCorr:4.60,

Fragment match tolerance used for search: 0.05 Da

Fragments used for search: -H<sub>2</sub>O; y; -NH<sub>3</sub>; y; b; b; -H<sub>2</sub>O; b; -NH<sub>3</sub>; y

Protein:

- Complement factor B

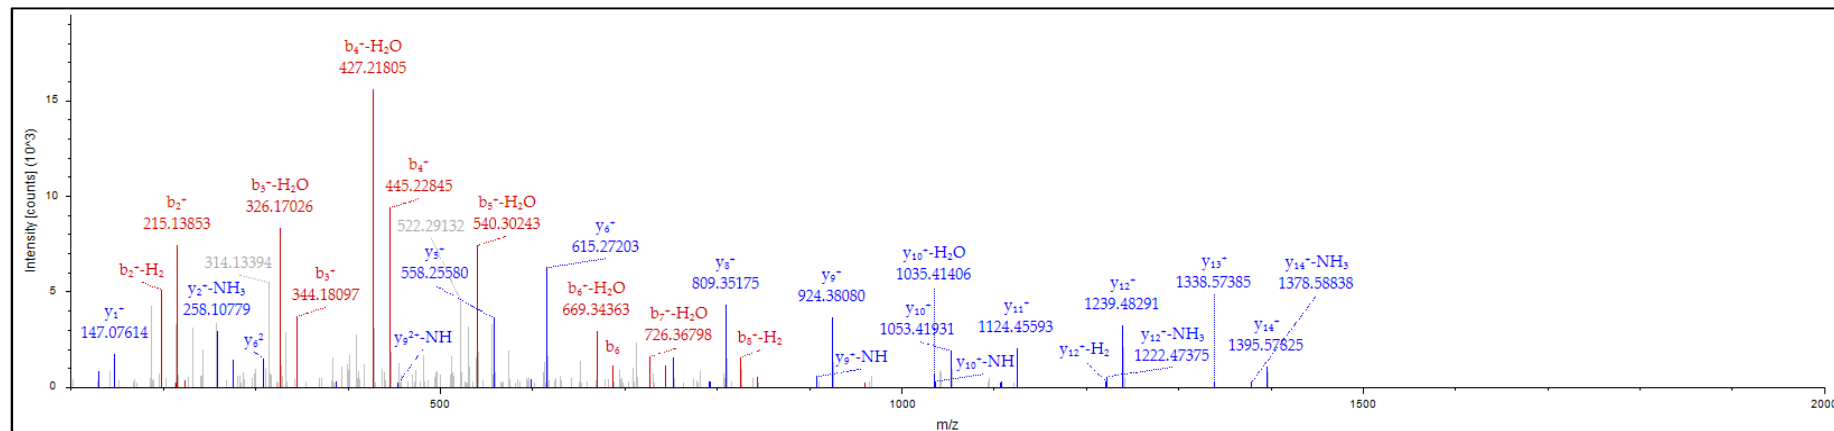

**e08035**

Sequence: TLTKAPVDLLGVAHNNL, Charge: +3, Monoisotopic m/z: 592.66925 Da (-2.74 mmu/-4.62 ppm), MH+: 1775.99320 Da,

Identified with: Sequest HT (v1.17); XCorr:2.75,

Fragment match tolerance used for search: 0.05 Da

Fragments used for search: -H<sub>2</sub>O; y; -NH<sub>3</sub>; y; b; b; -H<sub>2</sub>O; b; -NH<sub>3</sub>; y

Protein:

- Complement C4-A

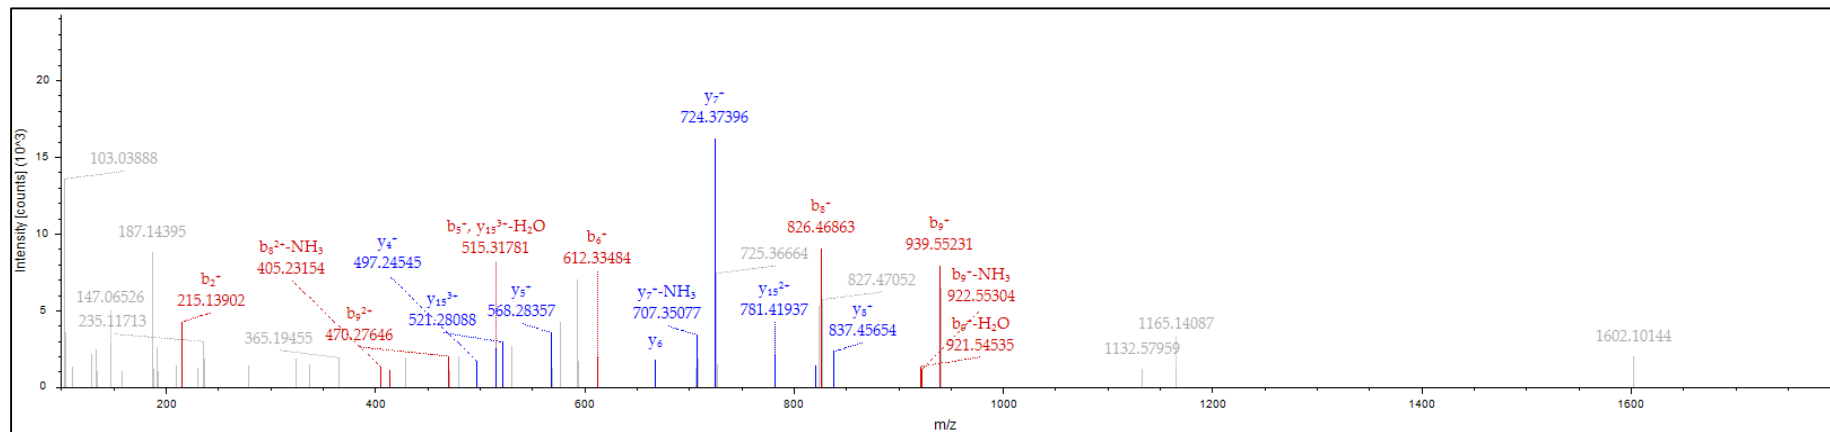

**e16041**

Sequence: EGVQKEDIPPADLSDQVPDTESETRIL, Charge: +3, Monoisotopic m/z: 994.49005 Da (-0.99 mmu/-1 ppm), MH+: 2981.45560 Da,  
Identified with: Sequest HT (v1.17); XCorr:3.55,  
Fragment match tolerance used for search: 0.05 Da  
Fragments used for search: -H<sub>2</sub>O; y; -NH<sub>3</sub>; y; b; b; -H<sub>2</sub>O; b; -NH<sub>3</sub>; y

Protein:

- Complement C3

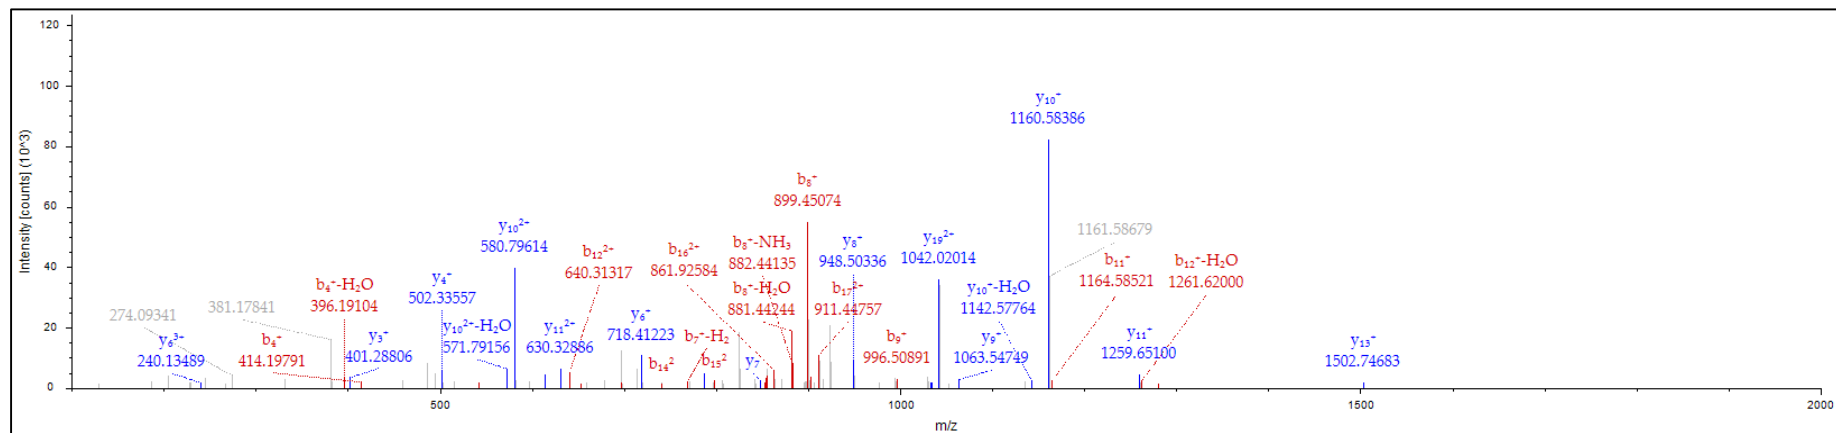

**e03984**

Sequence: APVDLLGVAHNNL, Charge: +2, Monoisotopic m/z: 666.86676 Da (-0.39 mmu/-0.59 ppm), MH+: 1332.72624 Da,

Identified with: Sequest HT (v1.17); XCorr:2.37,

Fragment match tolerance used for search: 0.05 Da

Fragments used for search: -H<sub>2</sub>O; y; -NH<sub>3</sub>; y; b; -H<sub>2</sub>O; b; -NH<sub>3</sub>; y

Protein:

- Complement C4-A

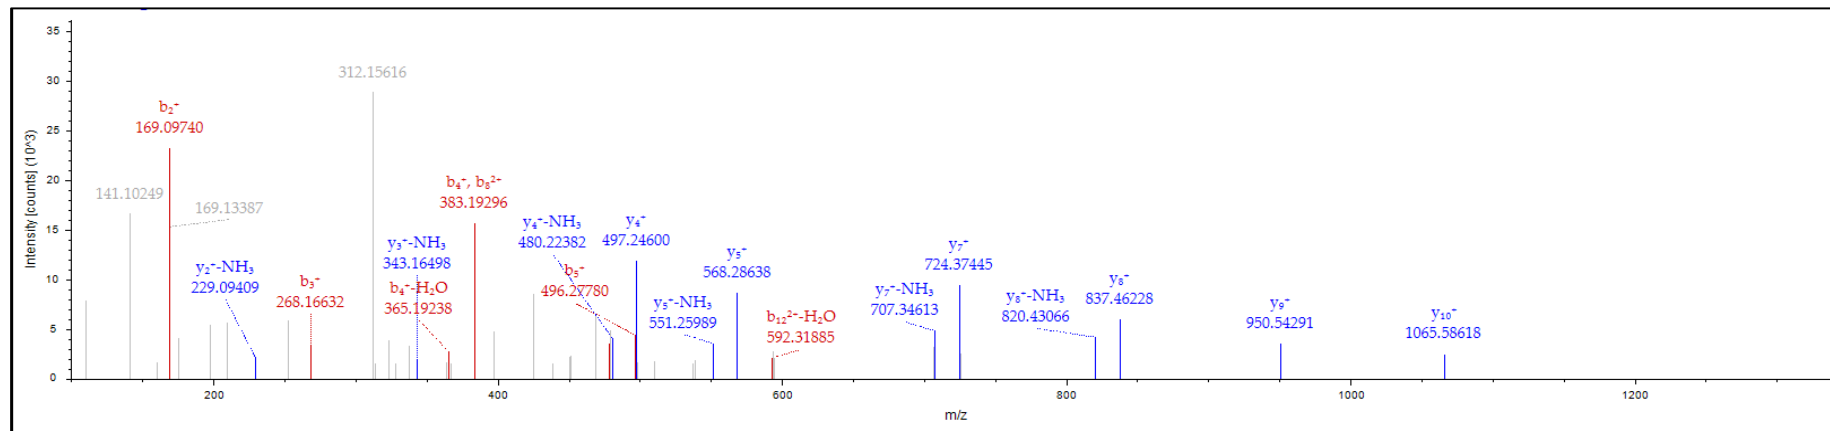

Supplement: s1 [file s1]
